# Supplementary material for: Single cell RNA sequencing reveals the role of local renin-angiotensin system in regulating ovarian physiological cycle and promoting PCOS
Source: Springer Nature journal article supplement (doi:10.1038/s41420-025-02531-8), 2025-05-27

Brightfield (maker)

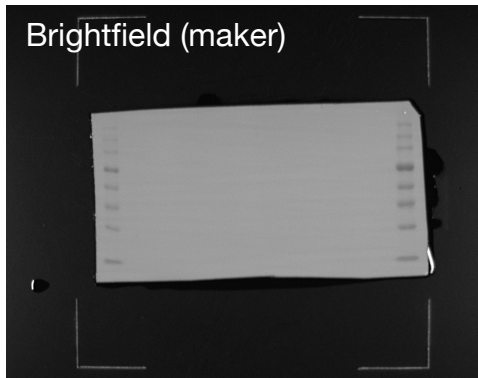

Developed by ECL

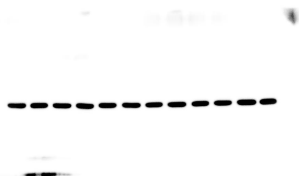

Merged

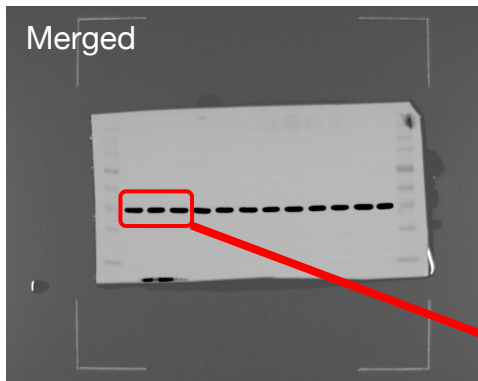

Name:  $\beta$ -actin

Host: Rabbit

Producer: abcam

Catalog: ab227387

Application: 1:6000

Clonality: Polyclonal

Observed MW: 42kDa

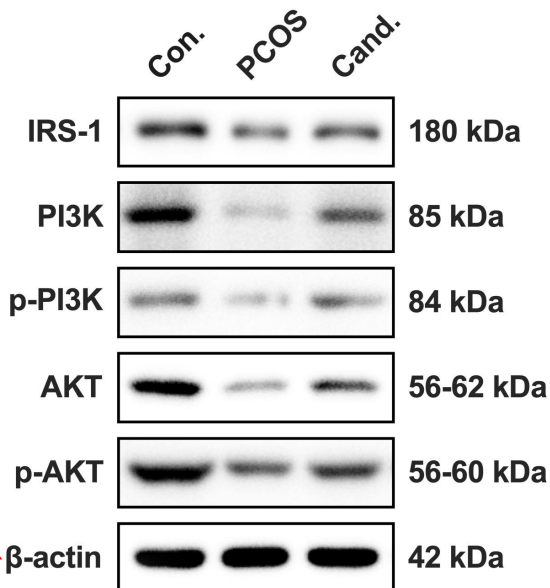

Brightfield (maker)

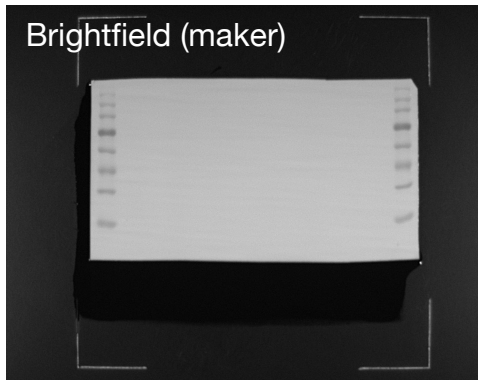

Developed by ECL

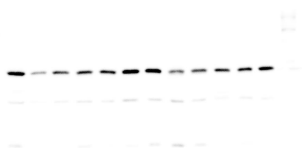

Merged

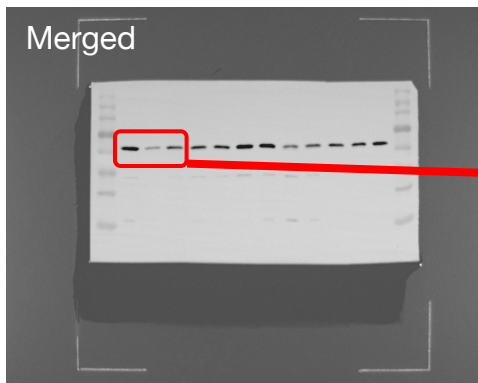

Name: AKT

Host: Rabbit

Producer: Proteintech

Catalog: 10176-2-AP

Application: 1:2000

Clonality: Polyclonal

Observed MW: 56-62kDa

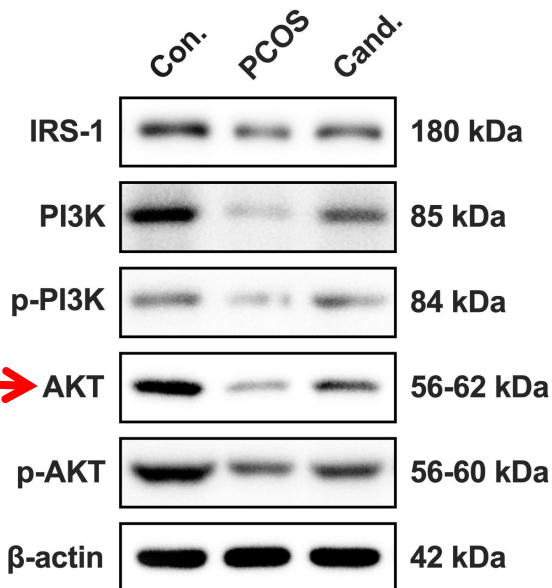

Brightfield (maker)

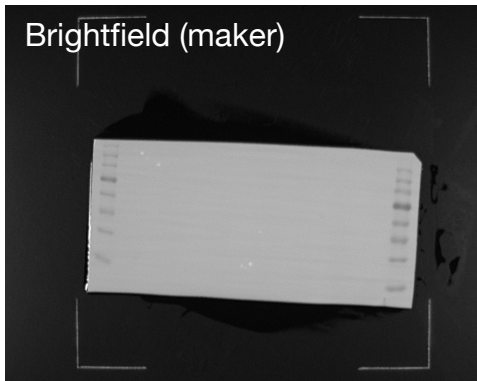

Developed by ECL

Name: Phospho-AKT

Host: Rabbit

Producer: Affinity

Catalog: AF0016

Application: 1:2000

Clonality: Polyclonal

Observed MW: 56-60kDa

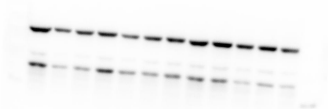

Merged

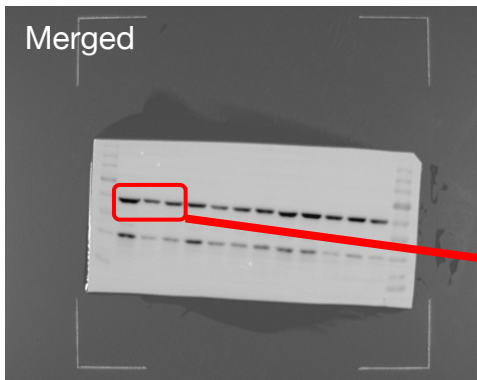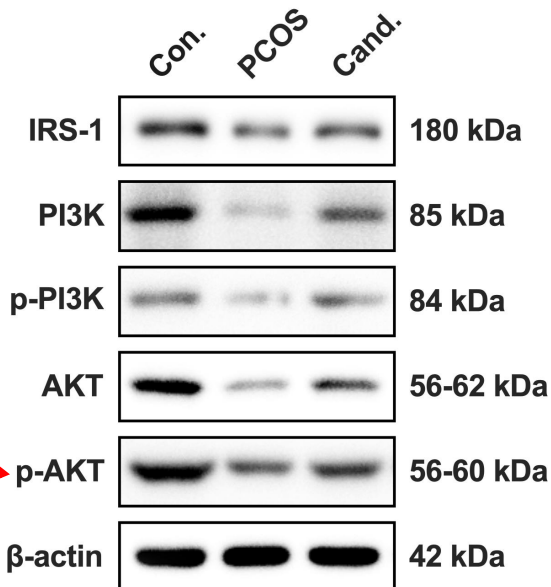

Brightfield (maker)

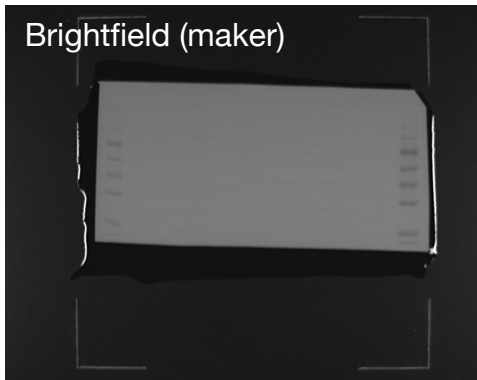

Developed by ECL

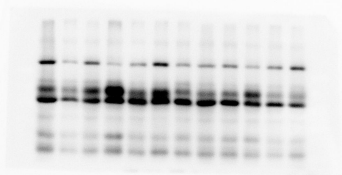

Merged

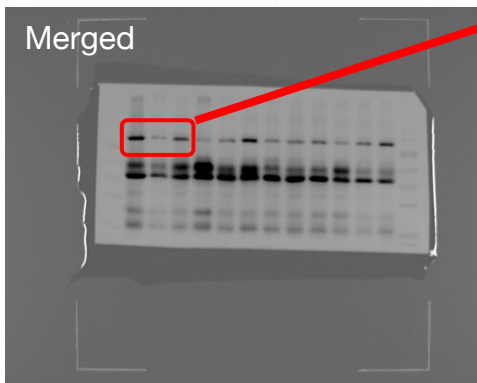

Name: PI3K p85

Host: Mouse

Producer: Proteintech

Catalog: 60225-1-Ig

Application: 1:5000

Clonality: Monoclonal

Observed MW: 85kDa

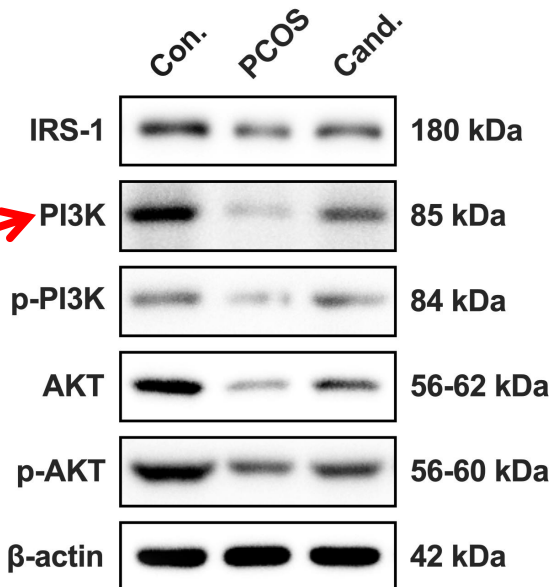

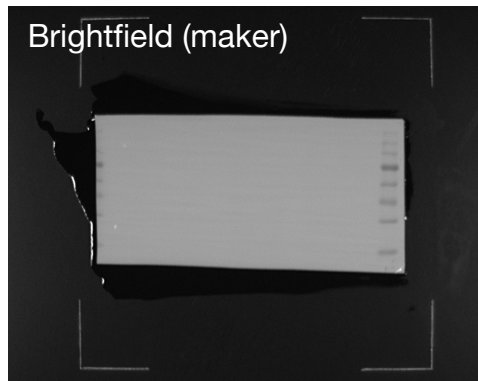

Developed by ECL

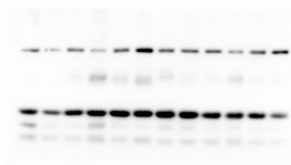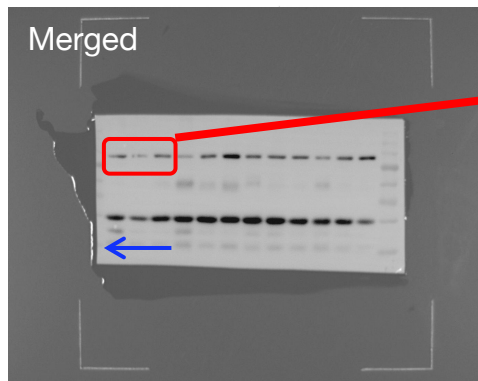

Name: Phospho-PI3K p85

Host: Rabbit

Producer: Affinity

Catalog: AF3242

Application: 1:2000

Clonality: Polyclonal

Observed MW: 84kDa

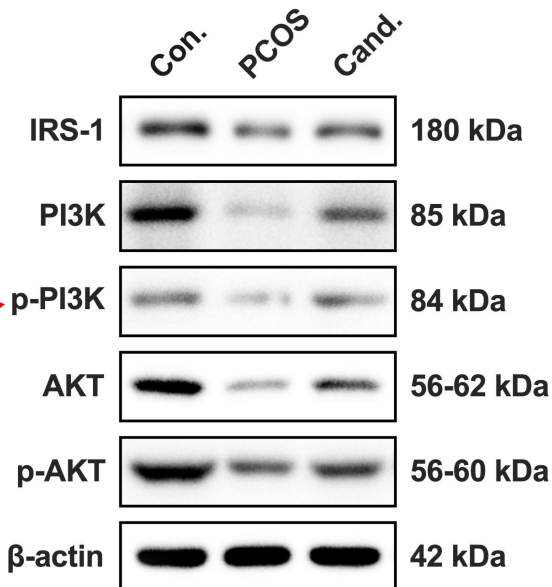

Brightfield (maker)

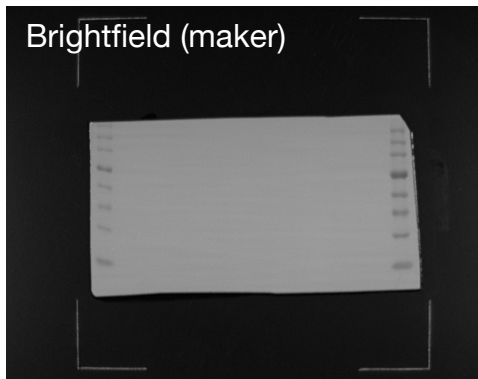

Developed by ECL

-----

Name: IRS1

Host: Rabbit

Producer: ABclonal

Catalog: A16902

Application: 1:1000

Clonality: Polyclonal

Observed MW: 180kDa

Merged

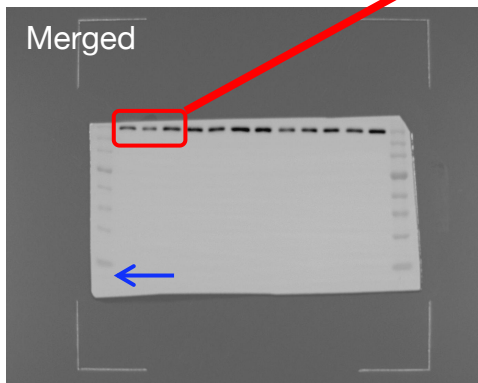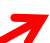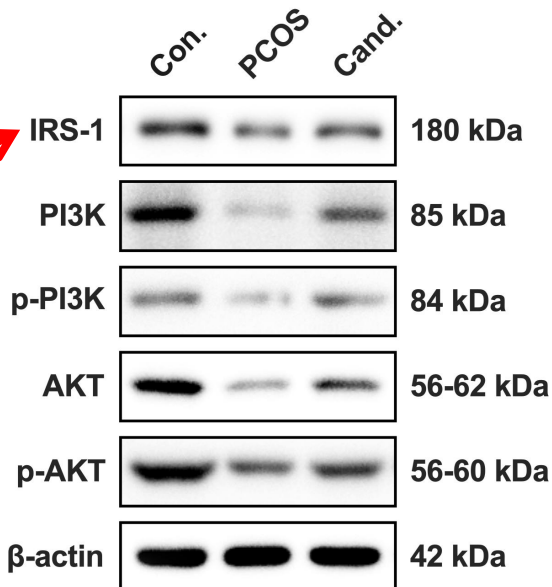

Supplement: MOESM2 [file 41420_2025_2531_MOESM2_ESM.pdf]
